# Supplementary material for: A flexible and highly ion conductive polyzwitterionic eutectogel for quasi-solid state zinc ion batteries with efficient suppression of dendrite growth
Source: Royal Society of Chemistry journal article supplement (doi:10.1039/d2ta05009a), 2022-01-01
Supplement: d2ta05009a1.pdf [file d2ta05009a1.pdf]

Supporting information

**Flexible and Highly Ionic Conductive Polyzwitterionic Eutectogel for  
Quasi-solid State Zinc Ion Batteries with Efficient Suppression of  
Dendrites Growth**

Yihan Wu, Yongqi Deng, Kefu Zhang, Yu Wang, Lele Wang, Lifeng Yan\*

Department of Chemical Physics, University of Science and Technology of China,  
Jinzhai road 96, Hefei, 230026, Anhui, China

Corresponding author: Lifeng Yan, Fax/Tel: +86-551-63606853;

E-mail: [lfyan@ustc.edu.cn](mailto:lfyan@ustc.edu.cn)

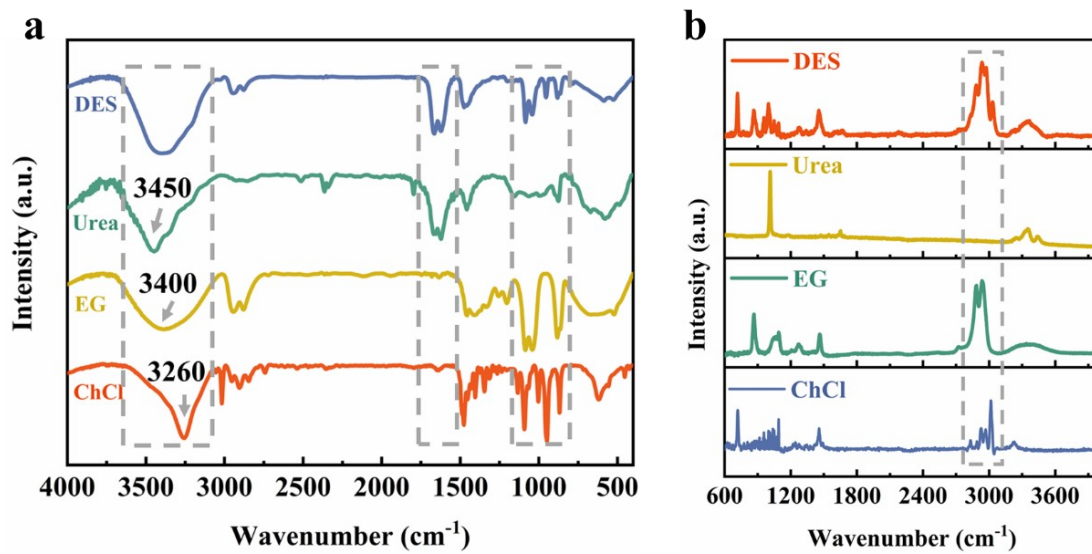

**Figure S1.** (a) FTIR spectra and (b) Raman spectra of DES solution and its components.

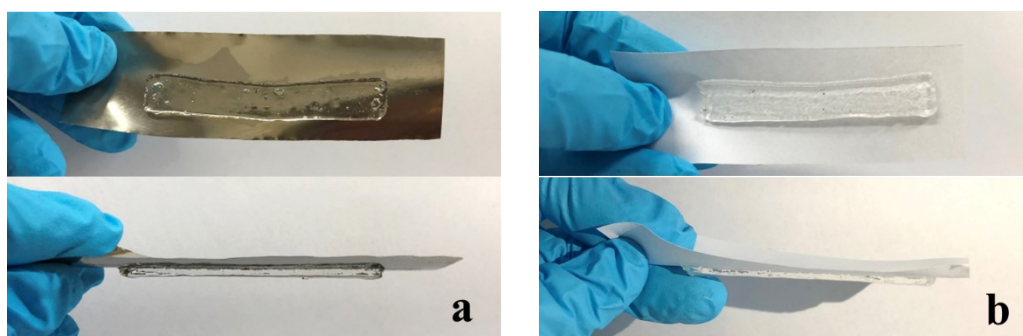

**Figure S2.** PSPE eutectogel has some adhesion on different substances: (a) Stainless Steel, (b) paper.

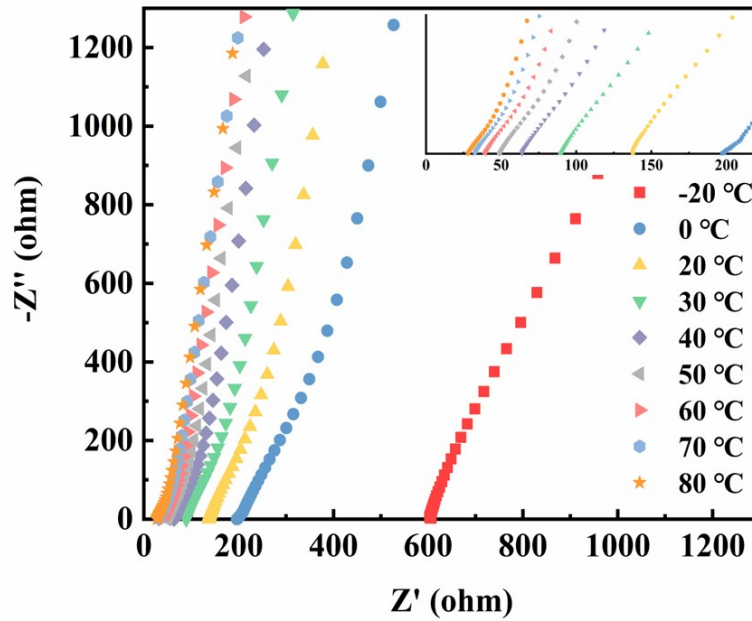

**Figure S3.** Ionic conductivity of the PSPE eutectogel at various temperature.

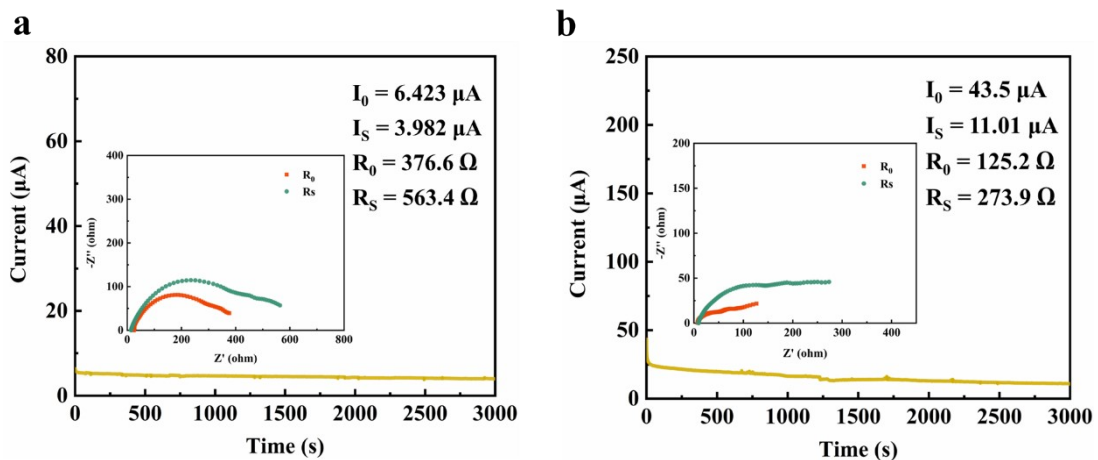

**Figure S4.** Zn//Zn symmetric cell in (a) PSPE and (b) ZD with an applied potential of 10 mV (inset: EIS spectra of the Zn//Zn symmetric cell).

The value of  $Zn^{2+}$  transference number ( $t_{Zn^{2+}}$ ) was characterized by combining the chronoamperometry (CA) technology and EIS. Testing the EIS from 100 kHz to 0.01 Hz with the Zn//Zn symmetric cell before and after polarization under 10 mV for 3000 s. And  $t_{Zn^{2+}}$  are calculated by Evans method:<sup>1</sup>

$$t_{Zn^{2+}} = \frac{I_S(\Delta V - I_O R_O)}{I_O(\Delta V - I_S R_S)}$$

Where  $\Delta V$  is the applied voltage (10 mV),  $I_O$  is the initial current and  $I_S$  is the steady-state current ( $\mu\text{A}$ ),  $R_O$  and  $R_S$  refer the initial and steady-state charge transfer resistances ( $\Omega$ ).

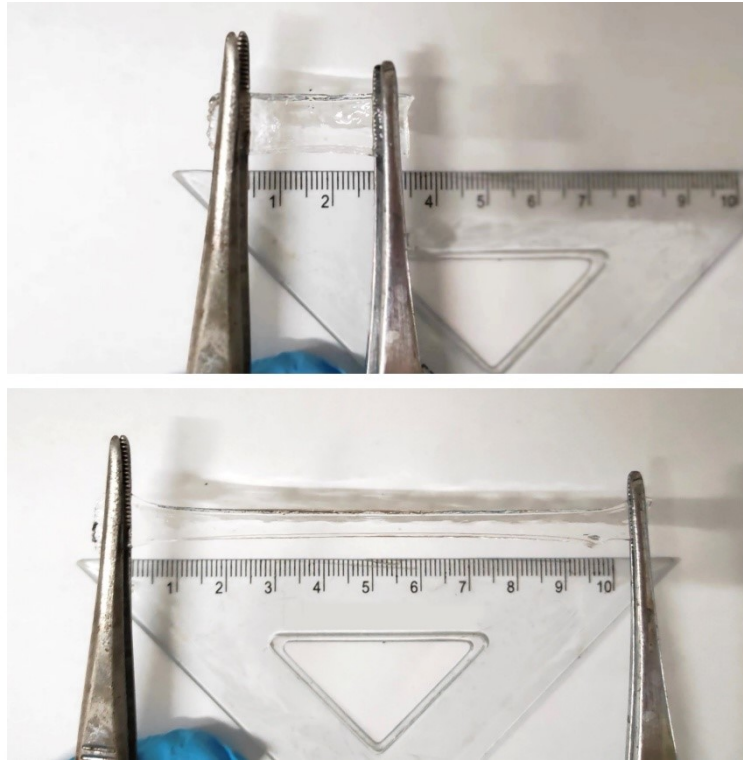

**Figure S5.** Photographs of PSPE eutectogel demonstrating remarkable mechanical property.

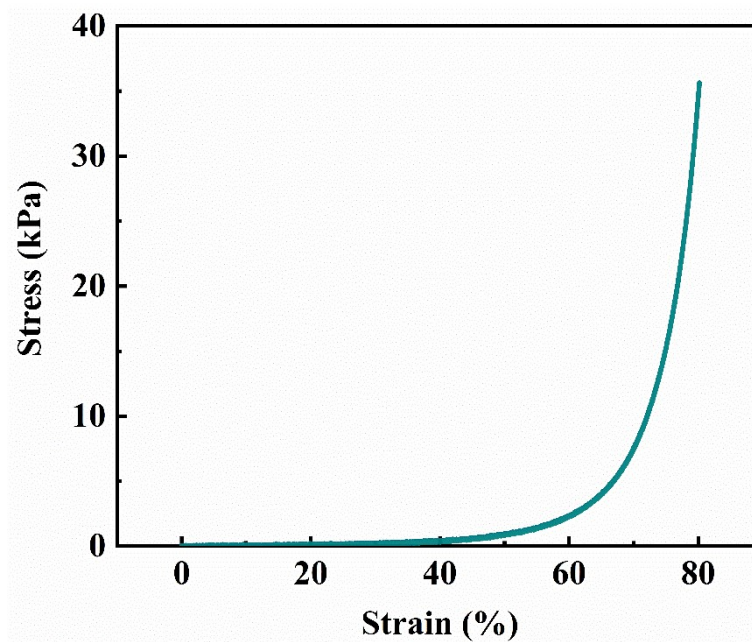

**Figure S6.** Compressing ability of the PSPE eutectogel.

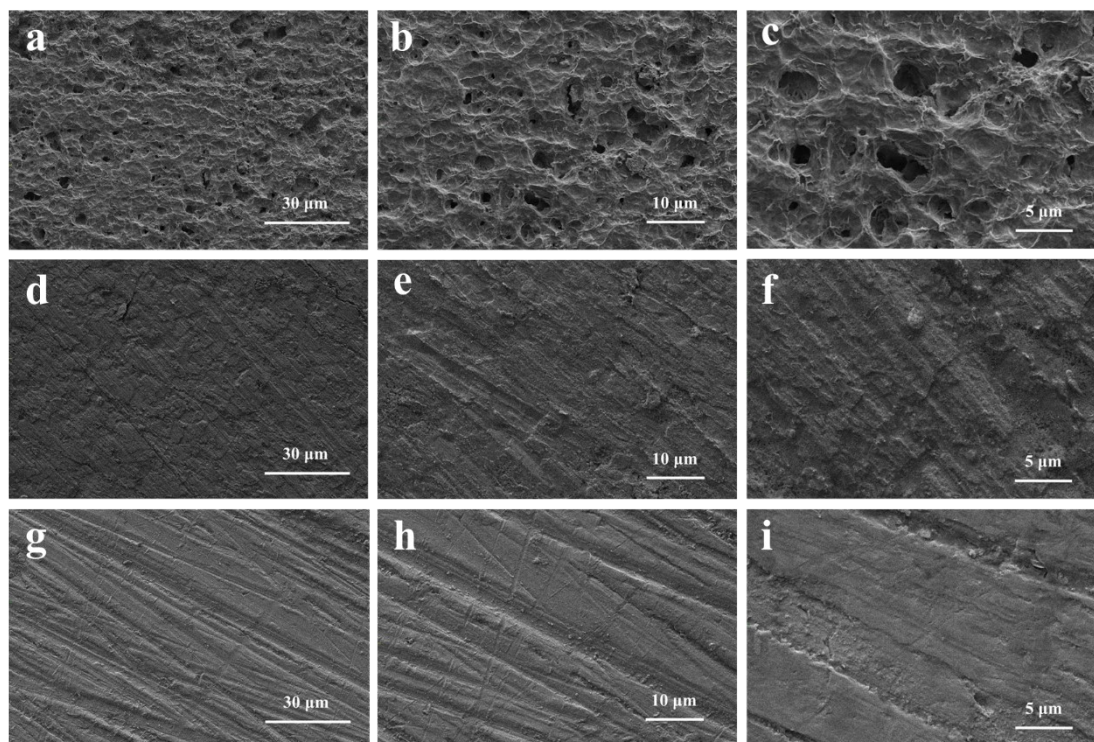

**Figure S7.** SEM image of Zn foil after immersing in AQ (a, b, c) and ZD (d, e, f) for 15 days, and contacting with PSPE (g, h, i) for 15 days.

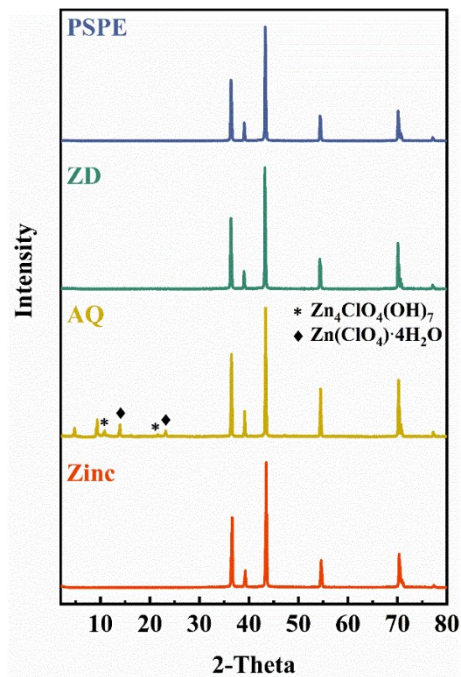

**Figure S8.** XRD patterns of Zn foil after immersing in AQ and ZD for 15 days, and contacting with PSPE for 15 days.

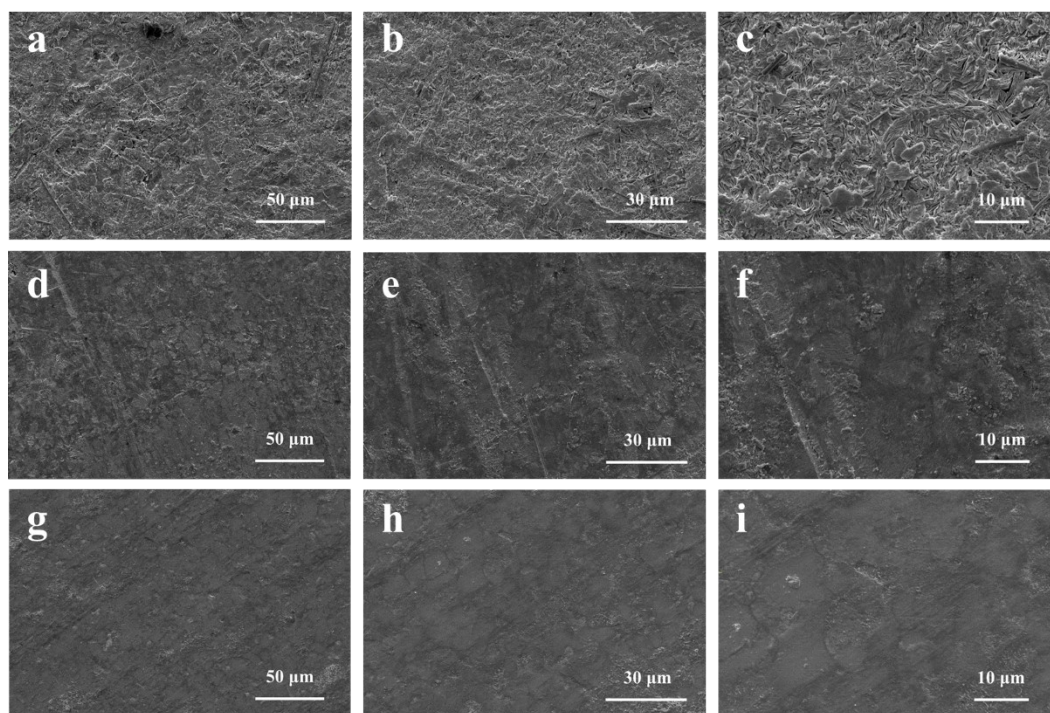

**Figure S9.** SEM images of the Zn metal surface in Zn//Zn cells after 2 cycles in AQ (a, b, c), ZD (d, e, f), and PSPE (g, h, i).

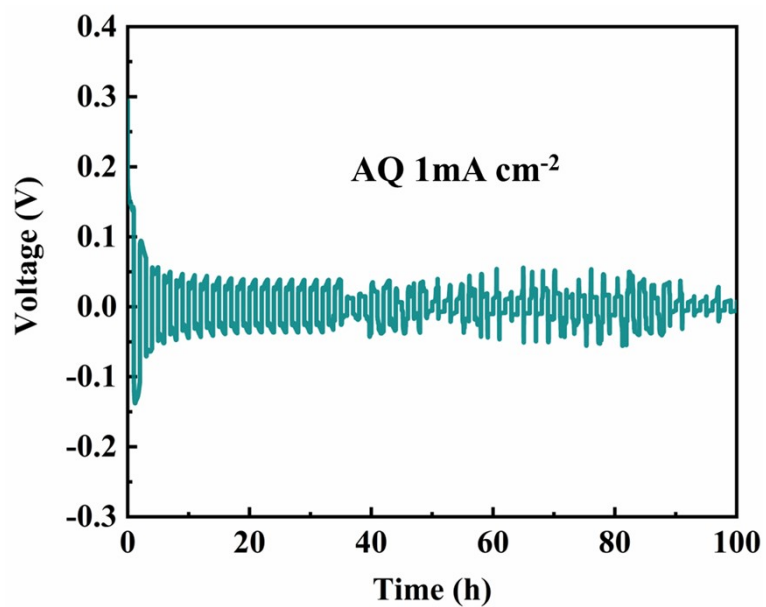

**Figure S10.** Galvanostatic Zn plating/stripping in Zn//Zn symmetric cells in AQ at 1 mA cm<sup>-2</sup>.

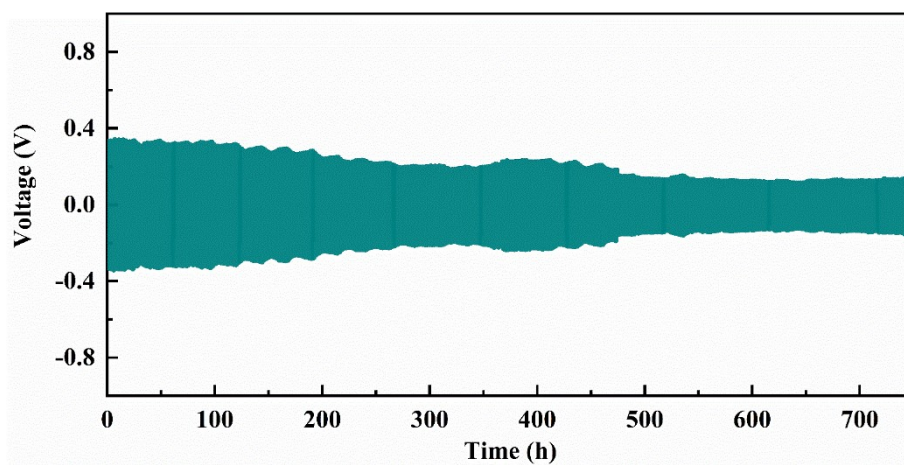

**Figure S11.** Galvanostatic Zn plating/stripping in Zn//Zn symmetric cells in PSPE at 2 mA cm<sup>-2</sup>.

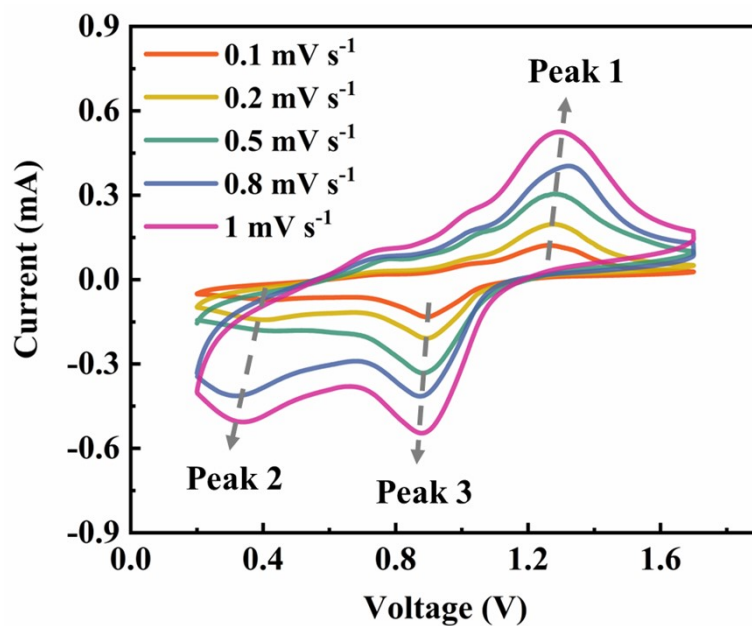

Figure S12. CV curves at different scan rates.

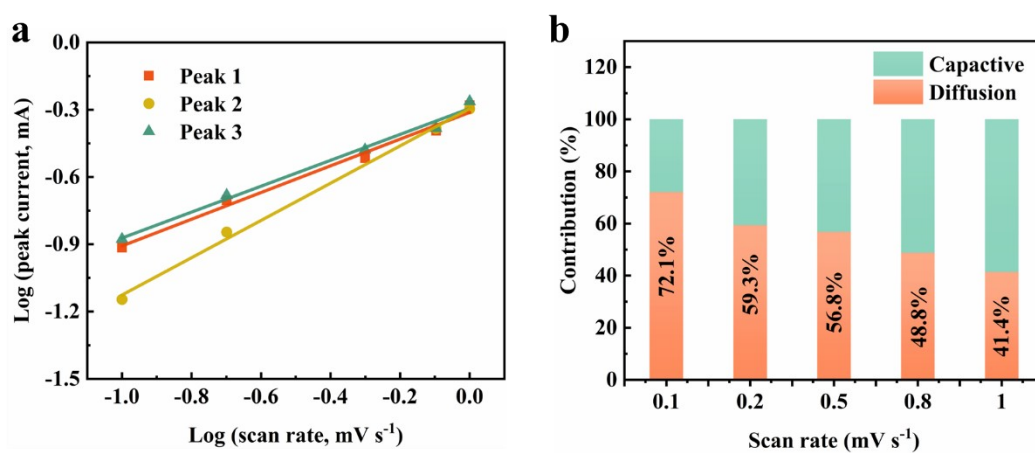

Figure S13. (a) Log (i) and log (v) plots at specific peak currents. (b) Capacity contribution ratios at various scan rates.



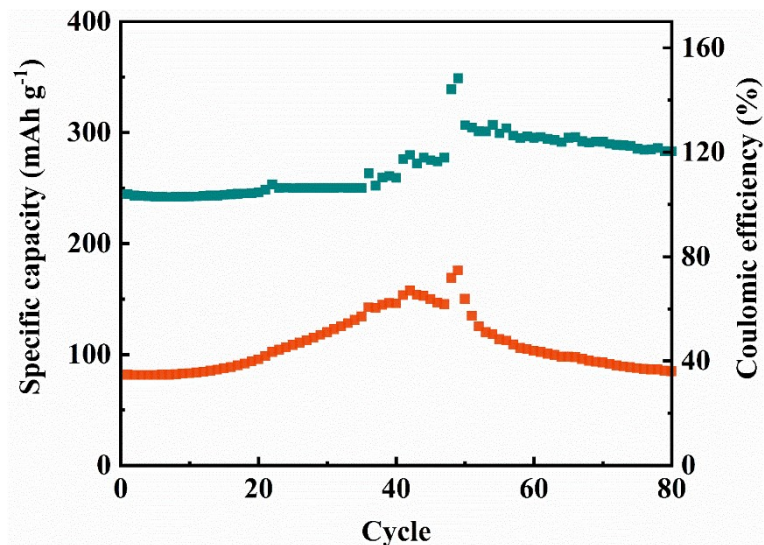

**Figure S14.** Cycling performance in AQ of full cell.

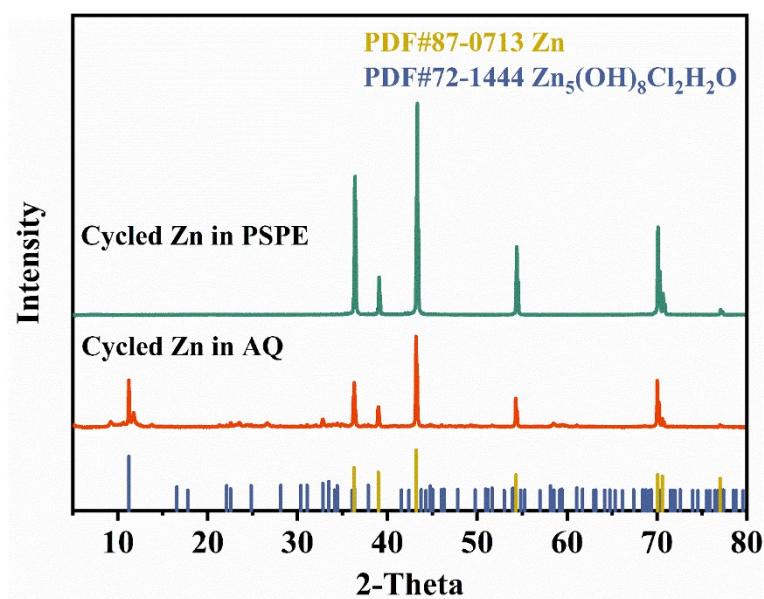

**Figure S15.** XRD patterns of Zn anodes of full cells after in AQ and PSPE.

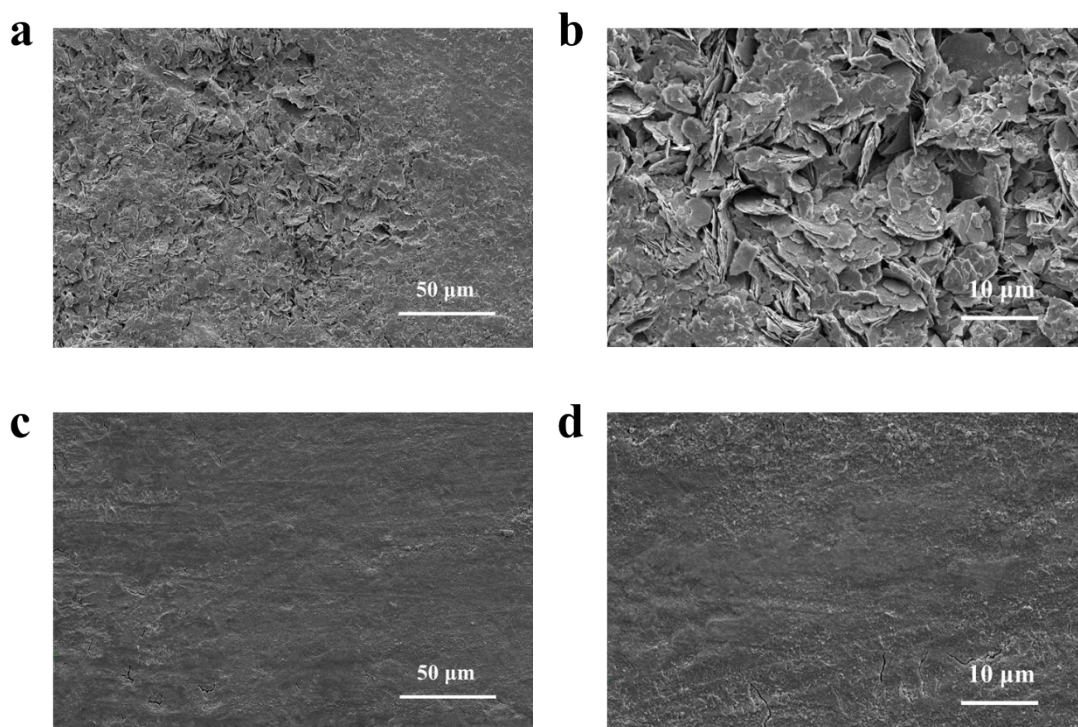

**Figure S16.** SEM image of Zn anode of full cells after 160 cycles in AQ (a, b) and 500 cycles in PSPE (c, d).

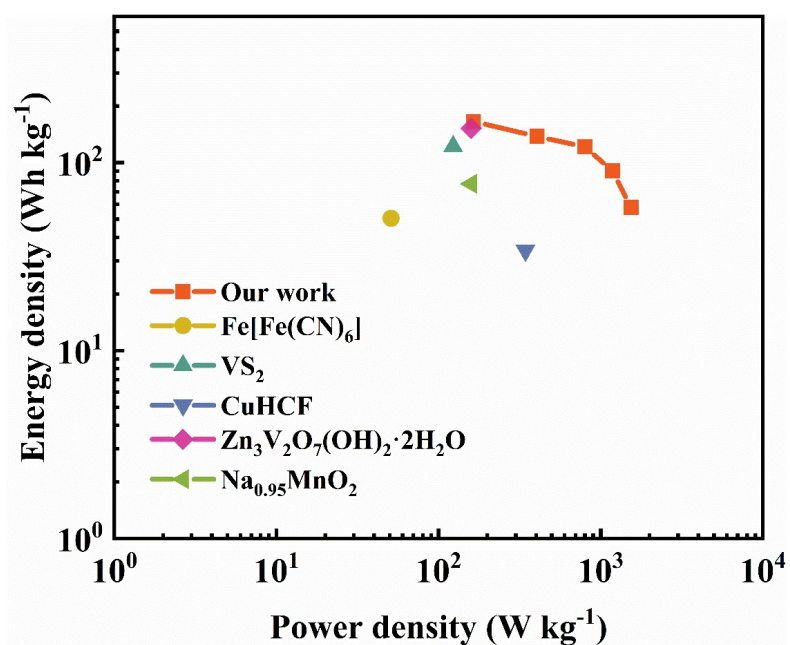

**Figure S17.** Comparison of energy density and power density of the PSPE eutectogel based zinc ion batteries on reported electrolyte systems and cathode materials.<sup>2-6</sup>

**Table S1.** Comparison of the water retention of various hydrogels for Zn ion batteries

| <b>Gel</b>      | <b>Temperature<br/>(°C)</b> | <b>Humidity<br/>(%)</b> | <b>Time<br/>(h)</b> | <b>Weight<br/>retention<br/>(%)</b> | <b>Ref.</b> |
|-----------------|-----------------------------|-------------------------|---------------------|-------------------------------------|-------------|
| IL-PAM          | 50                          | 10                      | 9                   | 73                                  | 7           |
| carrageenan/PAM | 60                          | 37                      | 74                  | 45                                  | 8           |
| PAAm–alginate   | 30                          | 26                      | 72                  | 15                                  | 9           |
| PAM             | 60                          | 10                      | 24                  | 23                                  | 10          |
| PSPE            | 60                          | 10                      | 55                  | 87.9                                | This work   |

## References

1. Z. Xing, G. Xu, X. Xie, M. Chen, B. Lu, J. Zhou and S. Liang, *Nano Energy*, 2021, **90**, 106621.
2. P. He, M. Yan, G. Zhang, R. Sun, L. Chen, Q. An and L. Mai, *Adv. Energy Mater.*, 2017, **7**, 1601920.
3. Z. Liu, P. Bertram and F. Endres, *J Solid State Electrochem*, 2017, **21**, 2021-2027.
4. R. Trocoli and F. La Mantia, *ChemSusChem*, 2015, **8**, 481-485.
5. C. Xia, J. Guo, Y. Lei, H. Liang, C. Zhao and H. N. Alshareef, *Adv. Mater.*, 2018, **30**, 1705580.
6. B. Zhang, Y. Liu, X. Wu, Y. Yang, Z. Chang, Z. Wen and Y. Wu, *Chem. Commun.*, 2014, **50**, 1209-1211.
7. J. Huang, X. Chi, Y. Du, Q. Qiu and Y. Liu, *ACS Appl. Mater. Interfaces*, 2021, **13**, 4008-4016.
8. J. Wu, Z. Wu, H. Xu, Q. Wu, C. Liu, B.-R. Yang, X. Gui, X. Xie, K. Tao, Y. Shen, J. Miao and L. K. Norford, *Mater. Horiz.*, 2019, **6**, 595-603.

9. T. Liu, M. Liu, S. Dou, J. Sun, Z. Cong, C. Jiang, C. Du, X. Pu, W. Hu and Z. L. Wang, *ACS Nano*, 2018, **12**, 2818-2826.
10. C. Li, X. Deng and X. Zhou, *Polymers*, 2020, **12**, 2670.
